# Supplementary material
Source: Royal Society of Chemistry journal article supplement (doi:10.1039/d5cp04798f)

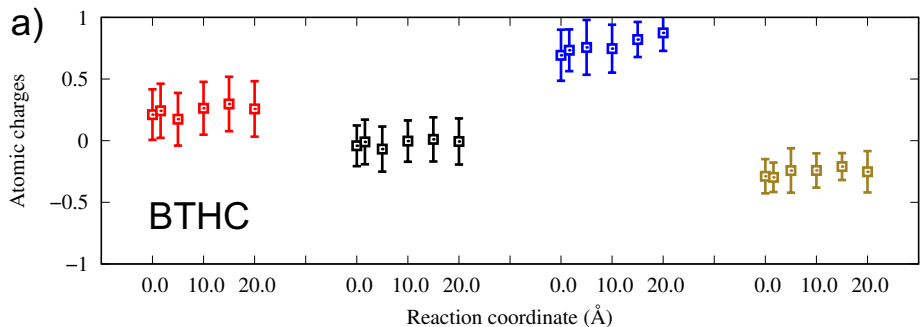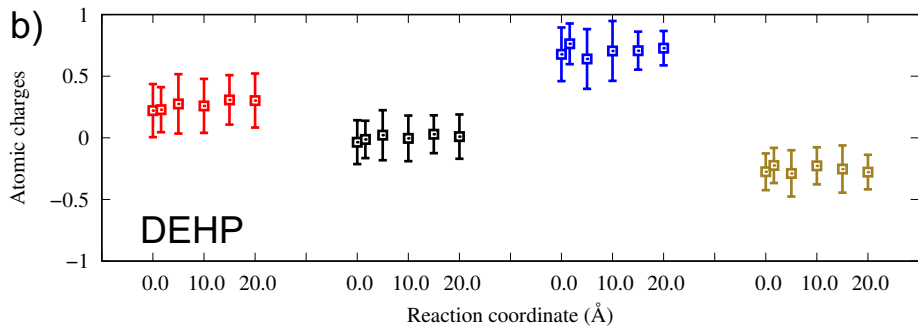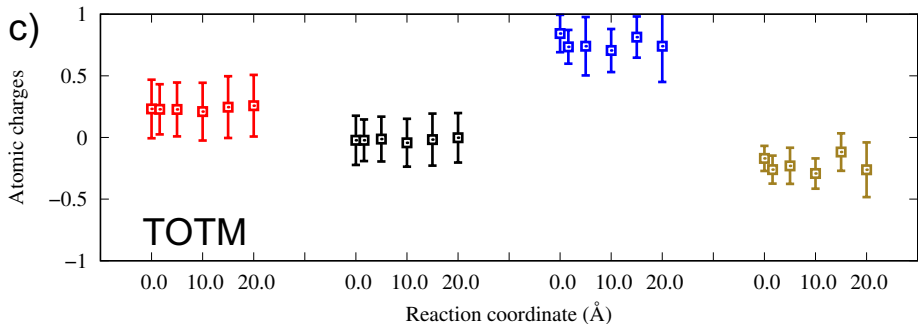

Supplement: d5cp04798f2.zip [file FigS29.pdf › SI/FigS29.pdf]
